# Supplementary material for: Prospective Study Using Plasma Apolipoprotein A2-Isoforms to Screen for High-Risk Status of Pancreatic Cancer
Source: PubMed Central journal article supplement (PMC7564617; doi:10.3390/cancers12092625), 2020-09-14
Supplement: cancers-12-02625-s001.pdf [file cancers-12-02625-s001.pdf]

**Supplemental table 1. Comparison of background characteristics between subjects**

**in the apoA2-ATQ/AT-positive group who did and did not undergo imaging**

**examinations**

| Characteristics                                      | No imaging examination performed ( <i>n</i> = 30) |        |               | Imaging examination performed ( <i>n</i> = 54) |        |               | P-value |
|------------------------------------------------------|---------------------------------------------------|--------|---------------|------------------------------------------------|--------|---------------|---------|
|                                                      | n                                                 | Values |               | n                                              | Values |               |         |
| Age (years)*                                         | 30                                                | 58.0   | (30–88)       | 54                                             | 63.5   | (32–88)       | 0.119   |
| Males (%)**                                          | 30                                                | 21     | (70)          | 54                                             | 34     | (63)          | 0.634   |
| Height (cm)                                          | 26                                                | 167.7  | (158.0–171.3) | 41                                             | 166.2  | (159.2–171.3) | 0.857   |
| Weight (kg)                                          | 26                                                | 63.8   | (52.3–76.7)   | 42                                             | 67.6   | (55.2–74.0)   | 0.696   |
| BMI (kg/m <sup>2</sup> )                             | 26                                                | 22.4   | (20.2–26.9)   | 41                                             | 24.5   | (22.0–26.3)   | 0.385   |
| Smokers (%)**                                        | 17                                                | 9      | (52.9)        | 25                                             | 13     | (52)          | 1       |
| Alcohol consumption (%)                              | 17                                                |        |               | 24                                             |        |               | 0.529   |
| daily                                                |                                                   | 1      | (5.9)         |                                                | 3      | (12.5)        |         |
| a few times a week                                   |                                                   | 7      | (41.2)        |                                                | 9      | (37.5)        |         |
| once a month                                         |                                                   | 6      | (35.3)        |                                                | 11     | (45.8)        |         |
| never                                                |                                                   | 3      | (17.6)        |                                                | 1      | (4.2)         |         |
| Diabetes (%)**                                       | 30                                                | 8      | (26.7)        | 54                                             | 11     | (20.4)        | 0.589   |
| History of pancreatic disease (%)**                  | 29                                                | 0      | (0)           | 48                                             | 5      | (10.4)        | 0.15    |
| WBC (×10/ <sup>6</sup> L)                            | 30                                                | 6.3    | (5.0–6.8)     | 54                                             | 5.4    | (4.6–7.3)     | 0.092   |
| RBC (×10/ <sup>6</sup> L)                            | 30                                                | 456.5  | (407.0–496.0) | 54                                             | 439.0  | (410.0–484.0) | 0.393   |
| Hb (g/mL)                                            | 30                                                | 14.3   | (12.7–15.1)   | 54                                             | 13.5   | (12.0–15.0)   | 0.126   |
| Ht (%)                                               | 30                                                | 43.0   | (38.5–45.8)   | 54                                             | 41.1   | (37.3–44.3)   | 0.206   |
| Plt (/μL)                                            | 30                                                | 22.6   | (18.7–27.0)   | 54                                             | 21.7   | (18.1–25.8)   | 0.421   |
| TP (g/dL)                                            | 30                                                | 7.1    | (6.7–7.3)     | 53                                             | 7.1    | (6.8–7.5)     | 0.497   |
| ALB (g/dL)                                           | 22                                                | 4.3    | (4.1–4.5)     | 48                                             | 4.3    | (4.0–4.5)     | 0.922   |
| AST (U/L)                                            | 30                                                | 19.0   | (14.0–23.0)   | 54                                             | 22.0   | (18.0–27.0)   | 0.007   |
| ALT (U/L)                                            | 30                                                | 17.0   | (13.0–23.0)   | 54                                             | 19.0   | (14.0–33.0)   | 0.308   |
| ALP (U/L)                                            | 29                                                | 200.0  | (164.0–235.0) | 53                                             | 198.0  | (155.0–253.0) | 0.965   |
| γ-GTP (U/L)                                          | 29                                                | 23.0   | (17.0–36.0)   | 54                                             | 21.0   | (15.0–40.0)   | 0.947   |
| T.BIL (mg/dL)                                        | 28                                                | 0.8    | (0.6–1.1)     | 46                                             | 0.8    | (0.6–1.0)     | 0.258   |
| UA (mg/dL)                                           | 30                                                | 5.5    | (4.6–6.3)     | 54                                             | 5.3    | (4.3–6.2)     | 0.818   |
| BUN (mg/dL)                                          | 30                                                | 14.5   | (11.0–18.0)   | 52                                             | 15.0   | (12.0–18.0)   | 0.889   |
| Cre (mg/dL)                                          | 30                                                | 0.79   | (0.68–0.87)   | 54                                             | 0.75   | (0.65–0.85)   | 0.761   |
| Na (mmol/L)                                          | 29                                                | 140.0  | (140.0–141.0) | 49                                             | 141.0  | (140.0–142.0) | 0.314   |
| K (mmol/L)                                           | 29                                                | 4.2    | (3.8–4.4)     | 49                                             | 4.0    | (3.9–4.3)     | 0.452   |
| Cl (mmol/L)                                          | 29                                                | 104.0  | (102.0–106.0) | 49                                             | 103.0  | (102.0–105.0) | 0.536   |
| Glucose (mg/dL)                                      | 30                                                | 102.5  | (97.0–114.0)  | 54                                             | 97.0   | (86.0–109.0)  | 0.079   |
| HbA1c (%)                                            | 28                                                | 5.5    | (5.3–6.4)     | 39                                             | 5.6    | (5.4–6.4)     | 0.426   |
| TC (mg/dL)                                           | 30                                                | 182.0  | (168.0–214.0) | 54                                             | 187.5  | (160.0–211.0) | 0.907   |
| LDL (mg/dL)                                          | 30                                                | 121.0  | (90.0–141.0)  | 54                                             | 115.0  | (91.0–133.0)  | 0.383   |
| HDL (mg/dL)                                          | 30                                                | 52.0   | (45.0–66.0)   | 54                                             | 55.5   | (49.0–67.0)   | 0.191   |
| TG (mg/dL)                                           | 30                                                | 92.0   | (66.0–121.0)  | 54                                             | 80.5   | (55.0–105.0)  | 0.193   |
| Amy (U/L)                                            | 29                                                | 69.0   | (52.0–90.0)   | 52                                             | 65.5   | (53.0–86.0)   | 0.906   |
| Pancreatic lesions detected by ultrasonography (%)** | 28                                                | 1      | (3.6)         | 47                                             | 9      | (19.1)        | 0.08    |

In univariate logistic analyses, patient characteristics were compared using Fisher's

exact test for categorical variables, and Welch's t test or the Wilcoxon rank-sum test for continuous variables. Values of  $p < 0.05$  were considered statistically significant.

Data are shown as median and interquartile range values. \*Data are shown as median and range values. \*\*Data are shown as absolute values and percentages. P, probability

**Supplemental table 2. Final diagnoses obtained using each imaging modality in the screening study**

|                                           | Total | CECT | MRCP | EUS |
|-------------------------------------------|-------|------|------|-----|
| Number                                    | 54    | 39   | 5    | 10  |
| Pancreatic cancer                         | 1     | 1    | 0    | 0   |
| Pancreatic cystic lesions                 | 14    | 8    | 3    | 3   |
| Intraductal papillary mucinous neoplasms  | 9     | 6    | 3    | 0   |
| Undefined pancreatic cysts                | 5     | 2    | 0    | 3   |
| Chronic pancreatitis                      | 3     | 1    | 0    | 2   |
| Pancreatic neuroendocrine tumors          | 1     | 0    | 0    | 1   |
| Autoimmune pancreatitis                   | 1     | 1    | 0    | 0   |
| History of pancreatoduodenectomy          | 1     | 1    | 0    | 0   |
| Agenesis of body and tail of the pancreas | 1     | 1    | 0    | 0   |
| Undefined pancreatic masses               | 1     | 1    | 0    | 0   |
| Focal fat invasion in the pancreas        | 1     | 0    | 1    | 0   |
| Suspected early chronic pancreatitis      | 2     | 0    | 0    | 2   |
| Normal pancreatic findings                | 28    | 25   | 1    | 2   |

CECT, contrast-enhanced computed tomography; MRCP, magnetic resonance cholangiopancreatography; EUS, endoscopic ultrasonography; IPMN, intraductal papillary mucinous neoplasms

**Supplemental table 3. Positive predictive value of the plasma apoA2-ATQ/AT level for detecting pancreatic cancer or high-risk lesions in patients with or without abnormal pancreatic ultrasonographic findings**

|                        | All subjects<br>with US findings | Abnormal pancreatic<br>US findings | Normal pancreatic<br>US findings |
|------------------------|----------------------------------|------------------------------------|----------------------------------|
| Number                 | 4675                             | 151                                | 4524                             |
| apoA2-ATQ/AT-positive  | 75                               | 10                                 | 65                               |
| Underwent imaging      | 47                               | 9                                  | 38                               |
| PC                     | 1                                | 1                                  | 0                                |
| PCL (IPMN)             | 10 (6)                           | 4 (4)                              | 6 (2)                            |
| CP                     | 2                                | 0                                  | 2                                |
| PPV for PC, PCL, or CP | 27.7%<br>(13/47)                 | 55.5%<br>(5/9)                     | 21.1%<br>(8/38)                  |

PC, pancreatic cancer; PCL, pancreatic cystic lesions; CP, chronic pancreatitis; PPV, positive predictive value; US, ultrasonography

**Supplemental table 4. Sensitivity values obtained using various cut-off values in the cross-sectional study**

| Disease<br>(number) | Sensitivity (apoA2-ATQ/AT level: $\leq 35.0$ $\mu\text{g/mL}$ ) |          |            |       |
|---------------------|-----------------------------------------------------------------|----------|------------|-------|
|                     | Sensitivity (apoA2-ATQ/AT level: $\leq 40.0$ $\mu\text{g/mL}$ ) |          |            |       |
|                     | Sensitivity (apoA2-ATQ/AT level: $\leq 45.4$ $\mu\text{g/mL}$ ) |          |            |       |
|                     |                                                                 |          |            | 0%    |
|                     |                                                                 | IA (n=2) |            | 0%    |
|                     |                                                                 |          |            | 50.0% |
|                     |                                                                 | 41.2%    |            | 45.5% |
|                     | R (n=17)                                                        | 47.1%    | IIA (n=11) | 54.5% |
|                     |                                                                 | 64.7%    |            | 72.7% |
|                     | 51.2%                                                           |          |            | 50.0% |
| PC (n=41)           | 61.0%                                                           |          | IIB (n=4)  | 50.0% |
|                     | 73.2%                                                           |          |            | 50.0% |
|                     |                                                                 |          |            | 54.5% |
|                     |                                                                 | 58.3%    | III (n=11) | 72.7% |
|                     |                                                                 | 70.8%    |            | 81.8% |
|                     | UR (n=24)                                                       | 79.2%    |            | 61.5% |
|                     |                                                                 |          | IV (n=13)  | 69.2% |
|                     |                                                                 |          |            | 76.9% |

PC was staged according to the UICC classification, 7<sup>th</sup> edition.

PC, pancreatic cancer; R, resectable stages; UR, unresectable stages; PCL, pancreatic cystic lesions; CP, chronic pancreatitis

**Supplemental figure 1. Distribution of plasma apoA2-ATQ/AT levels among all subjects in the screening study**

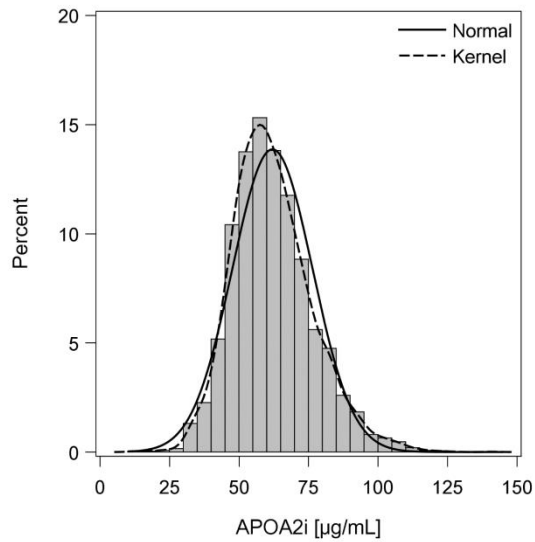

A Gray frequency distribution of the subjects' apoA2-ATQ/AT ( $\mu\text{g/mL}$ ) levels is shown. The broken line indicates the Kernel density estimate, and the solid line shows the normal distribution. The mean ( $\pm\text{SD}$ ) plasma apoA2-ATQ/AT level was 62.1 ( $\pm 14.4$ )  $\mu\text{g/mL}$ .

apoA2-ATQ/AT, apolipoprotein A2-ATQ/AT

**Supplemental figure 2. Distribution of plasma apoA2-ATQ/AT levels in the cross-sectional study**

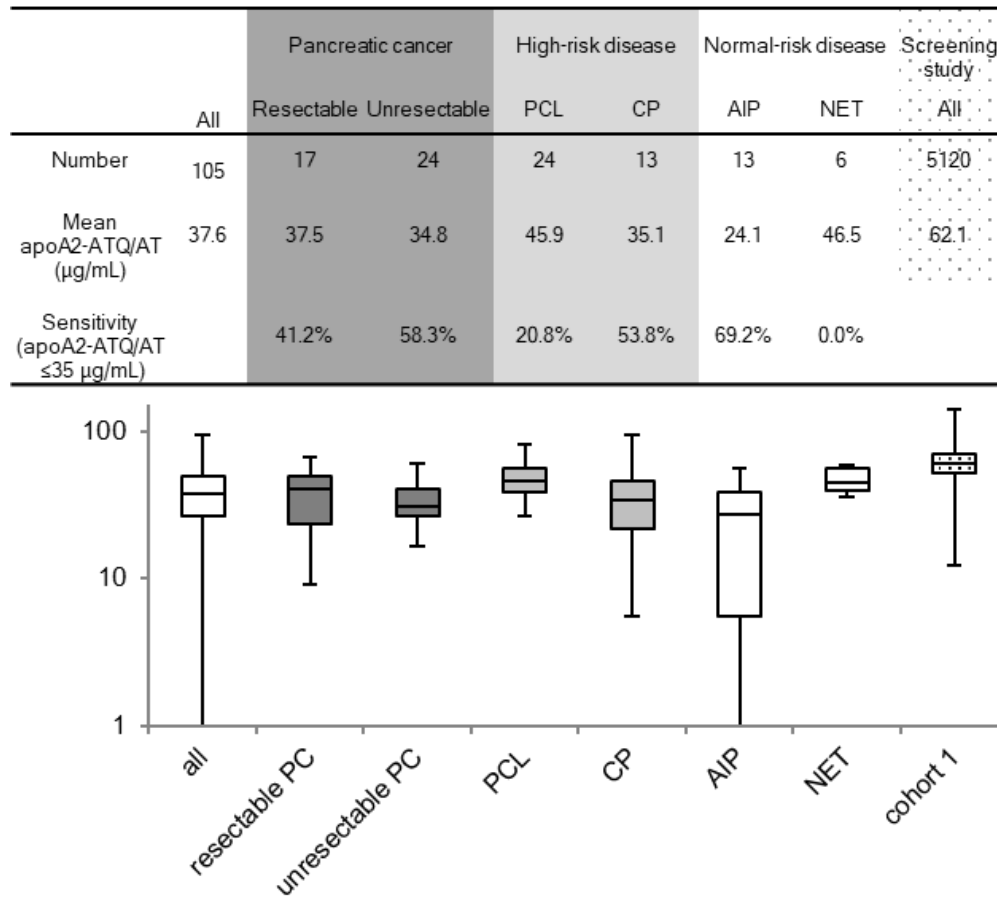

The numbers of subjects, mean apoA2-ATQ/AT levels, and sensitivity values obtained using a plasma apoA2-ATQ/AT level cut-off value of  $\leq 35 \mu\text{g/mL}$  for each disease are shown in the upper table. The results of the screening study are also shown on the right side of the table for comparison. The distribution of plasma apoA2-ATQ/AT levels is shown in the lower panel. No data for solid pseudo-papillary neoplasms or undefined masses are shown. Cohort 1 included all of the samples in the screening study.

center line, median; box limits, upper and lower quartiles; whiskers, 1.5x interquartile

range; points, outliers

apoA2, apolipoprotein A2; PCL, pancreatic cystic lesions; CP, chronic pancreatitis; AIP,

autoimmune pancreatitis; NET, pancreatic neuroendocrine tumors
